# Supplementary material
Source: bioRxiv or medRxiv preprint supplement (https://www.medrxiv.org/highwire/filestream/84483/field_highwire_adjunct_files/4/2020.06.03.20118570-5.pdf)
Supplement: Supplementary file [file 2020.06.03.20118570-5.pdf]

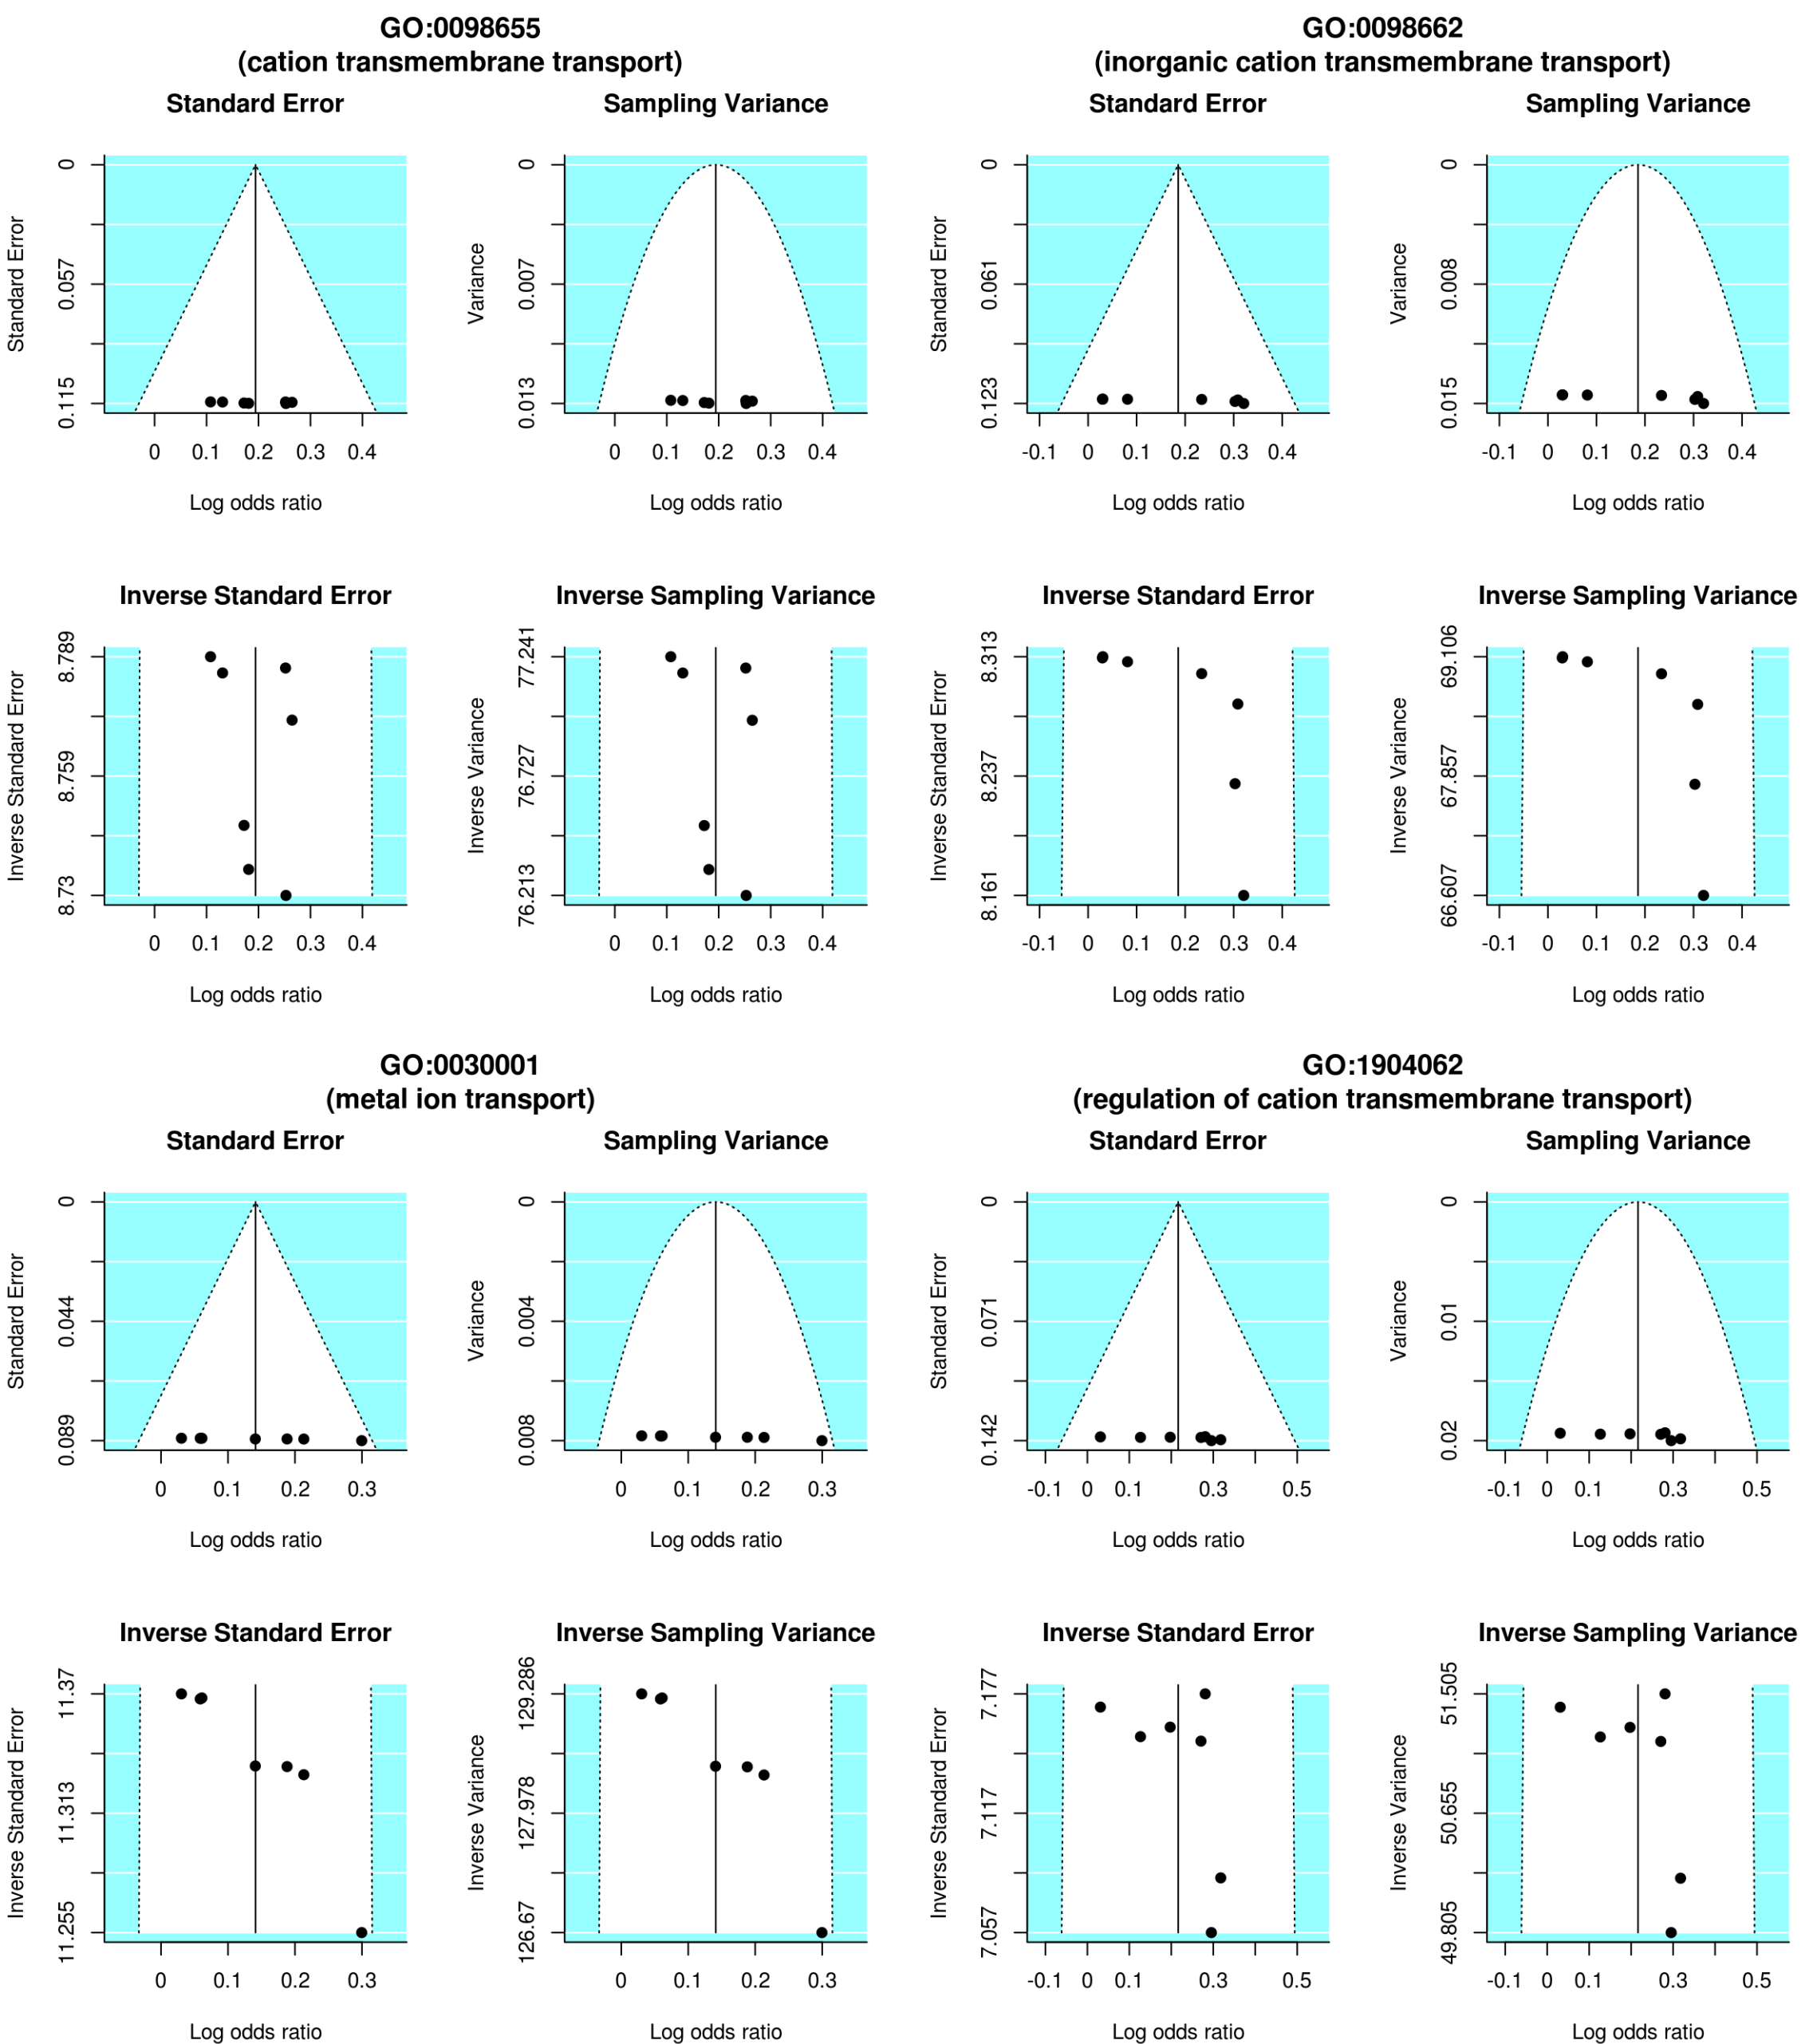

**Supplementary Figure 5. Funnel plots of significant GO terms from our functional pathway meta-analysis.** In the absence of bias and heterogeneity, we would expect the points to be distributed in the form of a funnel, within the region of confidence.
